1  
2  
3  
4  
5  
6  
7  
8  
9  
10  
11  
12  
13  
14  
15  
16  
17  
18  
19  
20  
21  
22  
23  
24  
25  
26  
27  
28  
29  
30  
31  
32

## The role of four cholesterol-recognition motifs localized between amino acid residues 400-550 in regulating translocation and lytic activity of Adenylate Cyclase Toxin

*Jone Amuategi<sup>1,2</sup>, Rocío Alonso<sup>3</sup> and Helena Ostolaza<sup>1,2\*</sup>*

<sup>1</sup>Department of Biochemistry and Molecular Biology, Faculty of Science and Technology, University of the Basque Country UPV/EHU, 48080 Bilbao, Spain.

<sup>2</sup>Instituto Biofisika (UPV/EHU, CSIC), University of the Basque Country, 48940 Leioa, Spain.

<sup>3</sup>Fundación Biofísica Bizkaia/Biofisika Bizkaia Fundazioa (FBB), Barrio Sarriena s/n, 48940 Leioa, Spain.

\*Corresponding author: Helena Ostolaza, Biofisika Institute (UPV/EHU, CSIC) and Department of Biochemistry and Molecular Biology, University of Basque Country (UPV/EHU), 48080 Bilbao, Spain. E-mail: [elenaamaya.ostolaza@ehu.eus](mailto:elenaamaya.ostolaza@ehu.eus); [orcid.org/0000-0002-2346-5228](https://orcid.org/0000-0002-2346-5228)

**Key words:** pore-forming toxins, RTX toxin family, cholesterol, CRAC motif, CARC motif, lipid-protein interactions, membrane topology, protein transport

33 **ABSTRACT**

34

35 Adenylate Cyclase Toxin (ACT or CyaA) is an important virulence factor secreted by  
36 *Bordetella pertussis*, the bacterium causative of whooping cough, playing an essential  
37 role in the establishment of infection in the respiratory tract. ACT is a pore-forming  
38 cytolytic belonging to the RTX (Repeats in ToXin) family of leukotoxins, capable of  
39 permeabilizing several cell types and pure lipid vesicles. Besides, the toxin delivers its  
40 N-terminal adenylate cyclase domain into the target cytosol, where catalyzes the  
41 conversion of ATP into cAMP, which affects cell signalling. In this study we have made  
42 two major observations. First, we show that ACT binds free cholesterol, and identify in  
43 its sequence 38 potential cholesterol-recognition motifs. Second, we reveal that four of  
44 those motifs are real, functional cholesterol-binding sites. Mutations of the central  
45 phenylalanine residues in said motifs have an important impact on the ACT lytic and  
46 translocation activities, suggesting their direct intervention in cholesterol recognition and  
47 toxin functionality. From our data a likely transmembrane topology can be inferred for  
48 the ACT helices constituting the translocation and the hydrophobic regions. From this  
49 topology a simple and plausible mechanism emerges by which ACT could translocate its  
50 AC domain into target cells, challenging previous views in the field. Blocking the ACT-  
51 cholesterol interactions might thus be an effective approach for inhibiting ACT toxicity on  
52 cells, and this could help in mitigating the severity of pertussis disease in humans.

53

54

55

56

57

58

59

60

61

62

## 63 INTRODUCTION

64 *Bordetella pertussis* causes in humans a highly contagious respiratory infection known  
65 as whooping cough (pertussis), which remains a significant cause of disease and death  
66 in infants worldwide [1-3]. The bacterium produces several virulence factors, among  
67 which the **Adenylate Cyclase Toxin** (ACT or CyaA) is crucial for colonization of the  
68 respiratory tract and establishment of the disease [1-3].

69 ACT belongs to an extensive family of T1SS-secreted toxins of Gram-negative  
70 pathogens, referred to as RTX (Repeats in ToXin) family, characterized by the presence  
71 in the C-terminal end of their sequences of numerous calcium-binding sites formed by  
72 Gly- and Asp-rich nonapeptide repeats [4,5]. ACT is a 1706 amino acid polypeptide  
73 initially synthesized as pro-toxin, that is covalently acylated in the bacterial cytosol at two  
74 conserved internal Lys residues (Lys 860 and Lys 983) by a dedicated acyltransferase,  
75 CyaC [6]. ACT is then secreted across both bacterial membranes by the type I secretion  
76 system [7]. Calcium binding to the RTX repeats (at mM range) and post-translational  
77 palmitoylation promote folding of ACT making the toxin fully competent for biological  
78 activity [8].

79 ACT is distinguished from the rest of RTX toxins by bearing a cell-invasive N-terminal  
80 enzymatic adenylate cyclase (AC) domain (~364 residues) fused to a C-terminal RTX  
81 haemolysin moiety (~1342 carboxy-proximal residues) [5]. The catalytic AC domain  
82 converts ATP into cAMP [9]. The C-terminal RTX moiety is responsible for the  
83 translocation of the AC domain across the host plasma membrane and for the lytic  
84 properties of ACT on cells [5]. This RTX moiety further consists of: a translocation region  
85 (TR), spanning residues ≈400 to 500, which has been directly involved in the transport  
86 of the AC domain across the plasma membrane [10]; a hydrophobic domain (HD),  
87 spanning residues ≈500 to 700, containing several  $\alpha$ -helical segments, which have been  
88 involved in pore formation [11]; an acylation region spanning residues 750 to 1000 that  
89 contains the two conserved acylation sites [6]; a calcium-binding RTX domain, between  
90 residues 1008 and 1590, which harbours the characteristic Gly- and Asp-rich  
91 nonapeptide repeats that form the numerous (~40) calcium-binding sites of ACT—  
92 hallmark of ACT membership to the RTX family [4]. The last ≈116 residues at the RTX  
93 haemolysin domain constitute the non-cleavable secretion signal recognized by the  
94 dedicated T1SS system [12].

95 It is believed that the primary ACT targets are myeloid phagocytic cells that possess the  
96 CD11b/CD18 integrin, which acts as toxin receptor [13], although ACT can also efficiently  
97 intoxicate a variety of cells lacking the integrin, such as erythrocytes or epithelial cells,  
98 likely through a direct interaction with their plasma membrane [14]. To generate cAMP  
99 inside the target cell, ACT binds to the cell membrane and translocates its AC domain  
100 across the plasma membrane by a mechanism that remains poorly understood. Once in  
101 the cytosol, the AC domain catalyzes the unregulated conversion of intracellular ATP to  
102 cAMP in a reaction that is stimulated by eukaryotic calmodulin [9]. Production of  
103 unregulated levels of cAMP subverts cellular physiology and suppresses bactericidal  
104 functions of phagocytes [15]. The RTX haemolysin moiety of ACT forms in lipid bilayers  
105 oligomeric pores that account for the haemolytic activity of the toxin [16, 17].

106 The exact step-by-step membrane interactions of ACT leading to AC domain  
107 translocation and to formation of lytic pores remains poorly understood, due in part to  
108 lack of structural data of membrane-inserted toxin molecules. From different mutational  
109 studies it has been proposed that the TR and the HD of ACT are directly implicated in  
110 AC domain translocation and pore formation [11, 18-25]. Both TR and HD are predicted  
111 to consist of several  $\alpha$ -helices. In the TR two  $\alpha$ -helices are predicted to form between  
112 residues 413 to 434 and 454 to 484, respectively that appear to interact with lipid bilayers  
113 [11, 25]. In the HD five putative amphipathic or hydrophobic  $\alpha$ -helices (HI<sub>502-522</sub>, HII<sub>527-</sub>

114 550, HIII<sub>571-592</sub>, HIV<sub>607-627</sub> and HV<sub>678-698</sub>) have been traditionally considered (predicted by  
115 the algorithm of Eisenberg) [26].

116 By analogy with other known pore-forming toxins, it is assumed that the hydrophobic  
117 helical domain of ACT inserts into the lipid bilayer forming a hydrophilic pore that would  
118 eventually lead to cell lysis. By contrast, the molecular mechanisms and the structural  
119 elements involved in AC domain translocation are less clear, and remain a matter of  
120 intense research. Several models have been postulated the last years [27, 28]. One  
121 model posits that the ACT pore-forming activity is not implicated in the delivery of the AC  
122 domain across target cell membrane, and that on its way into the cytosol the  
123 translocating AC domain bypasses the cation-selective and lytic pore formed by ACT  
124 into the membrane [19, 27]. Further, the authors of the model propose that cell-invasive  
125 and pore-forming activities of ACT are independent and mutually excluding, operating in  
126 parallel in target cell membrane, and predict that two distinct ACT conformers insert into  
127 the membrane in parallel, one being the translocation precursor, accounting for AC  
128 delivery across the cellular membrane, the other being a pore precursor eventually  
129 forming an oligomeric pore and provoking potassium efflux from cells [19]. So far  
130 however, none of those supposed two ACT conformers have been isolated. Furthermore,  
131 structural integrity of all the transmembrane helices of the HD were shown to be essential  
132 for AC domain translocation across the plasma membrane of both CD11b+ and CD11b-  
133 cells [19, 23, 24]. A second model posits that upon ACT insertion into the target cell  
134 membrane, a helical peptide extending from residue 454 to 484 interacts with the plasma  
135 membrane and destabilizes the lipid bilayer which would favour direct AC translocation  
136 across the lipid bilayer [28]. High affinity binding of that segment with calmodulin in the  
137 cell cytosol would then assist the irreversible translocation of the entire AC domain [28].  
138 Data by others demonstrating the translocation of unrelated polypeptides fused to the  
139 ACT haemolysin moiety [29], weaken however reliability of this hypothesis. Recently we  
140 showed that an ACT phospholipase A activity might be involved in AC translocation  
141 facilitating insertion of transmembrane segments through toroidal perturbations formed  
142 by the enzymatic end-product [30].

143 Our laboratory has recently provided the first nanoscale pictures of ACT lytic pores in  
144 lipid membranes [17]. We have revealed that ACT pores are not fixed-sized narrow pores  
145 as was believed, but instead are dynamic proteolipidic pores (toroidal pores) involving  
146 lipids, besides toxin molecules. Additionally, we have found that cholesterol in the  
147 membrane notably stimulates the lytic activity of ACT [31]. These data strongly  
148 suggested that ACT might directly interact with this sterol in the membrane. Because  
149 several proteins known to directly interact with cholesterol possess in their  
150 transmembrane domains sequences the so-called cholesterol-recognition motifs (CRAC  
151 motifs with the **L/V-X(1-5)-Y/F-X(1-5)-R/K** pattern, or CARC motifs with the **R/K-X(1-5)-  
152 Y/F-X(1-5)-L/V** pattern [32-34] we decided to take a closer look at possible functional  
153 cholesterol-recognition motifs in ACT. Here we have identified 38 CRAC and CARC  
154 putative motifs. Basing on their specific location in ACT sequence we have focused our  
155 investigation on four of such motifs, namely: the CARC<sup>415</sup>, CRAC<sup>485</sup>, CRAC<sup>521</sup> and  
156 CARC<sup>532</sup> sites located between amino acids 400-700. We reveal that the four motifs are  
157 real, functional cholesterol-binding sites, and crucial for both lytic and translocation  
158 activities of ACT on cells.

## 159 **RESULTS**

### 160 **Numerous potential cholesterol-recognition motifs can be identified in ACT** 161 **sequence**

162 Firstly we searched the ACT sequence for CRAC and CARC motifs. The sequence of  
163 ACT was obtained in FASTA format from UniProt (<http://www.uniprot.org/>). A search for  
164 CRAC and CARC motifs was then performed with EMBROSS: fuzzpro program

165 (<http://emboss.bioinformatics.nl/cgi-bin/emboss/fuzzpro>). Sequences given as a search  
166 pattern were: [LV]-X(1,5)-**Y/F**-X(1,5)-[RK], [RK]-X(1,5)-**Y/F**-X(1,5)-[LV]. We identified 20  
167 possible CRAC motifs and 18 potential CARC motifs in the ACT sequence (**Table I**).

168 From this set of 38 potential sites we chose four, designated from now on as CARC<sup>415</sup>,  
169 CRAC<sup>485</sup>, CRAC<sup>521</sup> and CARC<sup>532</sup>, for further investigation. This selection was based on  
170 the particular location of these four sites within ACT (**Fig 1**), the CARC<sup>415</sup> and CRAC<sup>485</sup>  
171 motifs are localized in the TR (residues ≈400-500) and the CRAC<sup>521</sup> and CARC<sup>532</sup> sites  
172 are in the HD (residues ≈500-700), both supposed to interact and insert into the target  
173 cell membrane and to be important for ACT functionality. The CARC<sup>415</sup> motif (residues  
174 413-420, **RSF<sup>415</sup>SLGEV**) is located at the N-terminus of a long  $\alpha$ -helix (h1, from now on)  
175 predicted to form between residues ≈413 to 434 of the TR, while the CRAC<sup>485</sup> motif  
176 (residues 481-487, **LMTQF<sup>485</sup>GR**) is located at the C-terminus of a second long  $\alpha$ -helix  
177 (h2, from now on) predicted to form between residues ≈454 to 484 of this region [27]; On  
178 other side, the CRAC<sup>521</sup> motif (residues 518-527, **VSGF<sup>521</sup>FR**) localizes at the C-terminus  
179 of the first predicted  $\alpha$ -helix (HI, from now on) of the HD, while the CARC<sup>532</sup> motif  
180 (residues 527-534, **RWAGGF<sup>532</sup>GV**) is located at the N-terminus of the second  $\alpha$ -helix  
181 (HII, from now on) of the HD. Thus, we anticipated that the selected four potential CRAC  
182 and CARC motifs might be relevant mediating the toxin interaction with the cell  
183 membrane cholesterol, and decided to test them.

#### 184 **Preincubation of ACT with free cholesterol, or extraction of the sterol from the cell** 185 **membrane with methyl- $\beta$ -cyclodextrin inhibit the toxin-induced haemolysis**

186 To corroborate that cholesterol plays a role in membrane binding and haemolysis by  
187 ACT, the toxin (100 nM) was preincubated with increasing concentrations of free  
188 cholesterol for 30 minutes at RT, and was then further incubated with erythrocytes in the  
189 presence of free cholesterol, and haemolysis was measured.

190 As depicted in **Fig 2A**, free cholesterol at concentrations above 5  $\mu$ M had a notable  
191 inhibitory effect on the toxin-induced erythrocyte lysis, suggesting that ACT may  
192 recognize and directly bind to membrane cholesterol. This idea was reinforced by other  
193 experiment in which cholesterol was extracted by pretreatment for 30 min of erythrocytes  
194 with methyl- $\beta$ -cyclodextrin (5 mM), an agent commonly used to remove cellular  
195 cholesterol [35]. As illustrated in **Fig 2B**, depletion of cholesterol by this compound  
196 reduced importantly the toxin-induced haemolysis in an ample range of toxin  
197 concentrations. Together these results suggested thus that ACT might have one or more  
198 specific binding sites for the sterol.

#### 199 **Substitutions by Ala of the central Phe in 415, 485, 521 and 532 positions, in the** 200 **respective potential cholesterol-recognition motifs of ACT, have a differentiated** 201 **effect on the toxin-induced haemolysis**

202 Mutations in the central Tyr or Phe residues in CRAC and CARC motifs have been shown  
203 to strikingly reduce or eliminate protein-cholesterol interactions in different cholesterol-  
204 binding proteins, affecting consequently protein activity in membranes [32-34].

205 To determine whether the here selected four sites are indeed functional, and to examine  
206 their possible implication in cholesterol binding by ACT, we constructed several mutant  
207 proteins with single Ala substitutions in the central Phe residues 415, 485, 521 and 532  
208 of the respective motifs. Then we checked firstly the effect of these mutations on the  
209 toxin-induced haemolysis.

210 **Fig 3** shows the raw traces of the kinetics recorded from a representative experiment of  
211 haemolysis induced by wild-type ACT (50 nM) or by each one of the four mutant toxins  
212 (50 nM), namely F415A, F485A, F521A and F532A mutants. From haemolytic kinetics

213 such as the observed in **Fig 3**, maximum haemolysis percentages were obtained at 180  
214 min and were represented in **Fig 4A**. In addition, the  $t_{1/2}$  values (time required to induce  
215 50% haemolysis) were plotted in **Fig 4B**.

216 As observed in the figures, the effect of the mutations was different depending on the  
217 location of the CRAC/CARC sites in the ACT primary structure. The individual  
218 substitutions of Phe by Ala in the respective CRAC<sup>521</sup> and CARC<sup>532</sup> motifs (F521A and  
219 F532A) at the HD, induced a prominent inhibitory effect in the lytic activity of the mutant  
220 toxins, in both cases slowing down the erythrocytes lysis (**Fig 3 and Fig 4B**) and reducing  
221 to the half the maximum haemolysis extent after 180 min of incubation (**Fig 4A**). In  
222 contrast, the single Ala substitutions of the central Phe in the CARC<sup>415</sup> and CRAC<sup>485</sup>  
223 motifs (F415A and F485A), led to a faster and a greater lytic activity of the respective  
224 mutant toxins, reflected in the significantly greater maximum haemolysis values obtained  
225 after 180 min incubation, and in the lower  $t_{1/2}$  values (time in minutes required to induce  
226 50% haemolysis) (**Fig 4**)

227 To check whether such mutations had any effect on toxin binding to lipid bilayers we  
228 performed a control experiment. Data represented in **Fig 5** indicated that the binding  
229 percentage was similar for the four mutant toxins relative to the intact ACT. This allowed  
230 us to rule out that the inhibition in the lytic activity caused by the F521A and F532A  
231 mutations was due to a lower protein binding. Similarly we could discard a greater  
232 binding as possible cause of the observed increment in the haemolysis percentage  
233 observed for the F415A, F485A mutant toxins. Together these data were a strong  
234 indication that the four cholesterol sites explored were real, functional sites, and that,  
235 while sterol binding through the CRAC<sup>521</sup> and CARC<sup>532</sup> motifs sites is essential for the  
236 pore-forming activity of ACT, the interaction of CARC<sup>415</sup> and CRAC<sup>485</sup> motifs with  
237 membrane cholesterol seems to hinder the ACT lytic activity, since preventing that  
238 interaction with the sterol by the F415A and F485A mutations promotes a greater lytic  
239 activity.

240 **Substitutions by Ala of the central Phe in 415, 485, 521 and 532 positions, in the**  
241 **respective cholesterol-recognition motifs of ACT, inhibit prominently AC domain**  
242 **translocation**

243 To determine whether the CARC<sup>415</sup>, CRAC<sup>485</sup>, CRAC<sup>521</sup> and CARC<sup>532</sup> motifs have any  
244 role in AC domain delivery, we measured the effect on cAMP production of the Ala  
245 substitution in the central Phe residues 415, 485, 521 and 532 of the respective mutant  
246 proteins, in J774A.1 cells (**Fig 6**).

247 As reflected in **Fig 6**, relative to intact ACT, the four single mutations F415A, F485A,  
248 F521A and F532A greatly impacted the capacity to deliver the AC domain by the  
249 respective mutant proteins in a range of toxin concentration between 25-200 ng/ml, with  
250 a more prominent inhibitory effect observed for the F521A and F532A mutations. Given  
251 that none of the mutations had any significant effect on toxin binding to cholesterol-  
252 containing lipid bilayers, results in **Fig 5** corroborated the previous conclusion that the  
253 selected four potential cholesterol binding motifs are real and functional cholesterol  
254 binding sites, and indicated besides, that ACT interaction with membrane cholesterol  
255 through the CARC<sup>415</sup>, CRAC<sup>485</sup>, CRAC<sup>521</sup> and CARC<sup>532</sup> motifs is crucial for AC domain  
256 translocation.

257

## 258 **DISCUSSION**

259 In this study we have made two major observations. First, we show that ACT binds free  
260 cholesterol, and identify in ACT sequence 38 potential cholesterol-recognition motifs,  
261 distributed all along the toxin primary structure. Second, we reveal that four of those  
262 motifs are real, functional cholesterol-binding sites, since substitutions by Ala of their

263 central Phe residues have important consequence on the lytic and translocation activities  
264 of ACT on target cells, suggesting their direct intervention in cholesterol recognition and  
265 toxin functionality.

266 We find that single mutation by Ala of the central Phe in 521 and 532 residues in the  
267 CRAC<sup>521</sup> and CARC<sup>532</sup> motifs, respectively, causes a potent reduction in the lytic and  
268 translocation capacities of ACT, without affecting its membrane association. Given that  
269 those motifs are placed in the HI and HII helices of the pore-forming domain (**Fig 1**), it  
270 can be inferred that a direct, and likely specific, interaction between those motifs and  
271 cholesterol drives the membrane insertion of these two helices, a step that, as judged by  
272 the results, is essential, for both haemolysis and AC translocation. We find, as well, that  
273 in the F415A and F485A mutants the AC translocation capacity is notably inhibited,  
274 whereas simultaneously they exhibit a greater lytic activity. Since the CARC<sup>415</sup> and  
275 CRAC<sup>485</sup> motifs are in the h1 and h2 helices of the TR, a region reported to interact with  
276 the membrane and to modulate the ACT pore-forming activity [11, 25], we can infer that  
277 cholesterol binding through these two motifs favours the insertion of h1 and h2 into the  
278 lipid bilayer. Our data indicate also that, such interaction, being necessary for AC domain  
279 translocation, simultaneously hinders the ACT lytic activity. Together thus, our results  
280 not only reaffirm the pivotal role played by the h1, h2, HI and HII helices in ACT biological  
281 activity, but, additionally, as we will crumble in the next paragraphs, they allow to  
282 delineate a plausible membrane topology for each helix in the ACT activities.

283 The CARC<sup>532</sup> motif (R<sup>527</sup>WAGGF<sup>532</sup>GV<sup>534</sup>) does not contain any polar charged residue  
284 except the N-terminal R527, and is located at the N-terminus of the HII helix (residues  
285 529-549), which is one of the hydrophobic  $\alpha$ -helices in the ACT pore-forming domain  
286 predicted to be transmembrane [22-24]. It is thus very likely that HII helix adopts a  
287 transmembrane position and that the N-terminal CARC<sup>532</sup> motif is embedded into the  
288 membrane. To predict its most likely orientation into the bilayer (N $\rightarrow$  C or C $\rightarrow$  N), we will  
289 assume the prevalence of the empirically demonstrated "positive-inside rule"  
290 (preferential occurrence of positively charged residues (Lys and Arg) at the cytoplasmic  
291 edge of transmembrane helices) [36, 37] in transmembrane helices and that both CARC  
292 and CRAC motifs are lineal oriented motifs. Then, it can be envisaged that HII helix would  
293 insert with its N-terminus oriented to the cytosolic side and the C-terminal end to the  
294 extracellular side of the membrane (C $\rightarrow$  N orientation). This orientation would place the  
295 R<sup>527</sup> residue and its positively charged guanidinium group emerging on the cytosolic side  
296 of the membrane (snorkelling effect) [38], while the hydrophobic V<sup>534</sup> would remain buried  
297 into the bilayer.

298 Upstream and adjacent to HII is the amphipathic HI helix (residues  $\approx$ 502-522) and the  
299 CRAC<sup>521</sup> site (V<sup>518</sup>SGF<sup>521</sup>FR<sup>523</sup>) at its C-terminus. HI possesses two Glu residues (E<sup>509</sup>  
300 and E<sup>516</sup>) in the middle of its sequence, so its transmembrane insertion would be poorly  
301 favourable. However, it is expected that a thermodynamically favourable binding to  
302 membrane cholesterol through the CRAC<sup>521</sup> motif could drive HI insertion into the  
303 membrane. Given the C $\rightarrow$  N orientation of HII, then HI would insert with N $\rightarrow$  C  
304 orientation. This would place the two CRAC<sup>521</sup> and CARC<sup>532</sup> motifs to the cytosolic side  
305 of the membrane, and the positively charged cationic groups of the R<sup>523</sup> and R<sup>527</sup> side  
306 chains emerging at the surface of the inner leaflet. Importantly, HI and HII are separated  
307 by the GSS triad (residues 524 to 526), so it is conceivable that HI-HII form a helical  
308 hairpin whose transmembrane topology will be greatly stabilized by the cholesterol  
309 binding through the CRAC<sup>521</sup> and CARC<sup>532</sup> motifs. Due to their sequential proximity,  
310 insertion of the HI-HII hairpin will reasonably determine the insertion of the neighbour  
311 HIII, HIV and HV helices at the pore-forming domain. Proper transmembrane insertion  
312 of all these helices will be implicitly necessary to form a functional pore structure. It is  
313 thus easily envisaged that mutations that affect cholesterol binding in either of the  
314 mentioned CRAC or CARC motifs, would have a deleterious, destabilizing effect on the  
315 hairpin insertion, which can explain pretty well the potent inhibitory effect of the F521A

316 and F532A mutations, on the ACT lytic capacity as shown here. On other side, given the  
317 C→ N orientation of HII helix, then the downstream HIII helix (residues ≈570-594) would  
318 insert with its N-terminus oriented to the extracellular side and the C-terminus towards  
319 the cytoplasmic side, positioning most likely the negatively-charged E<sup>570</sup> at the  
320 extracellular side, while the R<sup>594</sup> would locate at the cytoplasmic side of the membrane  
321 (positive-inside rule) [36].

322 Preceding the HI helix is the TR, constituted by the h1 and h2 helices, each one of which  
323 has a cholesterol-recognition motif in one end. It can thus be envisioned that a favourable  
324 cholesterol binding through the CRAC<sup>415</sup> and CARC<sup>485</sup> motifs could drive the h1 and h2  
325 insertion into the membrane. Because the CRAC<sup>415</sup> site (R<sup>413</sup>SF<sup>415</sup>SL<sup>417</sup>GEV<sup>420</sup>) is at the  
326 N-terminus of h1, and the CARC<sup>485</sup> site (L<sup>481</sup>MTQF<sup>485</sup>GR<sup>487</sup>) at the C-terminus of h2, and  
327 the downstream HI inserts with a N→ C orientation, then it can be anticipated that  
328 cholesterol binding by these two sites would favour h2 insertion with its C-terminus to  
329 the extracellular side and the N-terminus at the cytosolic side, and h1 insertion with its  
330 N-terminus to the extracellular side and the C-terminus to the cytosolic side. The h2 helix  
331 was predicted by other groups to be a long α-helix extending from residues ≈454 to 484,  
332 placing the two positively-charged Arg residues, R<sup>461</sup> and R<sup>474</sup>, in the middle of the helix  
333 [25, 39], which would presumably make very unfavourable its transmembrane insertion.  
334 However, the presence of the C-terminally located CARC<sup>485</sup> motif and its binding to  
335 cholesterol could expectedly turn the transmembrane insertion of this h2  
336 thermodynamically favourable. This transmembrane topology of h2 would be further  
337 favoured by placing the positively charged R<sup>461</sup> at the cytosolic side of the membrane,  
338 and perhaps the R<sup>487</sup> (last residue of the CARC<sup>485</sup> motif) at the extracellular side. This  
339 would make the h2 helix a little bit shorter at the N-terminus and a little bit longer at the  
340 C-terminus (residues 461 to 487) as compared to the length predicted for this helix by  
341 other investigators [25, 39], and would locate a single positive residue, the R<sup>474</sup>, within  
342 h2. In the case of h1, it is expectable that it would be flanked by the positively charged  
343 R<sup>435</sup> residue at the cytosolic side, and the R<sup>413</sup> at the extracellular flank. In sum, binding  
344 to membrane cholesterol emerges as instrumental for the proper membrane topology of  
345 both, the TR and the HD, and consequently essential for the toxin functionality. A scheme  
346 of the complete membrane topology for the h1, h2, HI, HII and HIII helices, as predicted  
347 here, has been drawn in **Fig 7**.

348 Of note, ACT contains at its HD other four CRAC motifs (CRAC<sup>632</sup>, CRAC<sup>658</sup>, CRAC<sup>725</sup>  
349 and CRAC<sup>738</sup>), all of which have a central Tyr residue instead of Phe (**Table I**). However,  
350 as recently reported, none of them appears to be involved in cholesterol recognition by  
351 ACT [40], which sounds consistent with their location in extracellular segments between  
352 helices of the HD. Therefore, by warranting the proper intra-membrane topology of the  
353 h1, h2, HI-IV helices, the here identified four cholesterol-recognition motifs would  
354 represent a “cholesterol sensor” necessary to initiate membrane insertion of two ACT  
355 regions essential for the toxin biological activities. Existence of such molecular  
356 mechanism may explain pretty well the cholesterol dependency shown by these ACT  
357 activities on target cells [32].

358 In the absence of structural data, the transmembrane topology and organization of the  
359 ACT translocation and HD involved in both AC delivery and pore formation has remain  
360 elusive. For more than two decades it has been assumed in the field that the pore-  
361 forming and the AC translocating activities associated with the ACT C-terminal  
362 haemolysin moiety (residues ≈400-1706) are fully independent, and occur in parallel,  
363 being associated with two different toxin conformers, one that would lead to direct AC  
364 transport across the lipid bilayer, and other, that upon oligomerization, would lead to pore  
365 formation [18-20, 40]. However, so far no demonstration has been provided for the  
366 existence of these hypothetical two different ACT conformers. Instead, on the basis of  
367 the here shown experimental data, and the membrane topology delineated from them, it  
368 can be concluded that both for AC transport and for lytic activity, ACT would adopt a



369 single transmembrane topology, stabilized by the binding to membrane cholesterol  
370 through the here identified four CRAC/CARC motifs. These data challenge thus the  
371 previously accepted model of conformational duality of ACT to perform its two biological  
372 activities [19, 40].

373 For long it has been also believed that the ACT pores are too small (0.6–0.8 nm in  
374 diameter) for the passage of even an unfolded polypeptide chain, which directly led to  
375 discard the possibility that the pore formed by this toxin might serve to transport the AC  
376 domain to the target cytosol, and to propose a unique “direct” transport of the AC domain  
377 across the plasma membrane [11, 31, 32]. Contrasting with this view, more recent results  
378 from our own laboratory have revealed that the ACT pores are of proteolipidic nature,  
379 involving lipid molecules besides segments of the protein [17]. As consequence of this  
380 more dynamic structure of the ACT pore, it may thus be envisioned that its hydrophilic  
381 lumen can be wider than previously believed. Consistently with this, and given that the  
382 AC domain is not itself capable of directly interacting with lipid bilayers [10], and AC  
383 delivery requires structural integrity of the pore-forming domain, our present results lead  
384 to contend that the simplest, most logic and most plausible mechanism by which the 400-  
385 residue-long AC polypeptide is transported to the target cell cytosol, is through the  
386 hydrophilic “hole” formed by the ACT pore-forming domain.

387 We hypothesize that the cholesterol-mediated transmembrane insertion of the h1-h2-HI-  
388 HII helices would bring the extracellularly located AC domain near the pore structure.  
389 Spatial proximity of the AC domain from the pore would plausibly allow interactions to be  
390 established between segments of the AC domain and one or several residues of said  
391 helices forming the pore (**Fig 7**). Such native interactions would be necessary to assure  
392 penetration of the AC polypeptide into the pore lumen and its transport to the target  
393 cytosol. It is thus anticipated that mutations that affect the cholesterol binding and hence  
394 the insertion of the helices, or that hinder the molecular interactions between the AC  
395 segments and pore segments will have a direct effect on AC translocation, in full  
396 consonance with our present results. That same reasoning predicts as well that the  
397 mutations that would inhibit AC translocation, could simultaneously lead to a lytic activity  
398 gain, since the same native interactions could sterically hinder the free ion flux through  
399 the pore lumen, perhaps until the translocation has finished and the AC domain is  
400 cleaved by target calpain, as recently reported by our laboratory [41]. This would explain  
401 why apparently ACT is weakly haemolytic relative to other RTX pore-forming toxins such  
402 as *Escherichia coli*  $\alpha$ -haemolysin [11]. Consistently, we find here that the F415A and  
403 F485A mutations inhibit translocation and enhance the lytic activity. Hampering  
404 cholesterol binding through the CARC<sup>415</sup> and CRAC<sup>485</sup> motifs would provoke a change  
405 in the topology of the h1-h2 helices, to be placed extracellularly and would gain in  
406 mobility. This would hinder establishment of the native interactions between the AC  
407 segments and the pore segments, moving away the AC domain from the pore entrance.  
408 This distancing of the AC domain would eliminate the steric hindrance at the pore  
409 entrance allowing a free ion flux, which would be detected as an increased lytic activity,  
410 at the same time that the AC delivery would result diminished (**Fig 8**).

411 From our model it is also evidenced the crucial role of the cholesterol binding through  
412 the CRAC<sup>521</sup> and CARC<sup>532</sup> motifs in ACT activities, since it would allow the  
413 intramembrane stabilization of the HI-HII hairpin, which would in turn determine the  
414 proper membrane topology of the remaining hydrophobic helices of the pore-forming  
415 domain. The HI helix has two negatively charged Glu residues, E<sup>509</sup> and E<sup>516</sup>, in middle  
416 of the helix, which would make transmembrane topology of HI poorly favourable.  
417 Cholesterol binding would become thus a way to overcome this energetic penalization,  
418 making HI insertion thermodynamically favourable. Curiously, other group had observed  
419 that net charge mutations E509K or E516K reduced to the half the AC translocation and  
420 cell association, but increased to twofold the haemolytic activity [19]. In contrast, E509V  
421 and E509Q substitutions had little effect on toxin activities [19]. Intriguingly, the double

422 substitution E509K+E516K exerted a strong synergic effect. Although the cell  
423 association remained similar to that of the single mutants (low binding), the cell-invasive  
424 activity of the double mutant was completely abolished, and the haemolytic activity was  
425 further enhanced fourfold [19]. Our model predicts that the net charge change in the  
426 double mutant (-2 to +2) would inhibit the transmembrane topology of HI, forcing this  
427 helix to place out of the membrane. Interestingly, this HI location could change the side  
428 of the membrane in which cholesterol would now be recognized by the CRAC<sup>521</sup> motif,  
429 passing from being bound in the cytosolic side of the membrane, to bind it in the  
430 extracellular side. Concomitantly, HI exit would force HII to insert into the bilayer with  
431 reverse orientation, and to achieve stabilizing through cholesterol binding via the  
432 CARC<sup>532</sup> motif, but now at the extracellular side of the membrane. This topology change  
433 of HII would in turn provoke subsequent change in the membrane topology of HIII, and  
434 so on for the rest of the helices that conform the pore structure (**Fig 9**). And yet another  
435 consequence can be anticipated, the change in location of the flanking residues of each  
436 one of the mentioned helices conforming the pore. This way, the residues initially located  
437 to the cytosolic side, such as R<sup>527</sup> (in HII) and R<sup>594</sup> (in HIII), would move to the  
438 extracellular side, whereas the located to the extracellular side, such as S<sup>554</sup> (in HII), D<sup>557</sup>  
439 and D<sup>558</sup> (in the loop HII-HIII) and E<sup>570</sup> (in HIII) would move to the cytosolic side. This  
440 would expectedly eliminate the aforementioned native interactions established with  
441 segments of the AC domain, moving the AC domain away from the pore entrance and,  
442 affecting consequently the AC translocation. Moreover, ion selectivity of the pore could  
443 also result altered by the inverted location of the residues at the ends of the helices. Fully  
444 supporting this it was detected a drop in the cation selectivity in the pores formed by the  
445 E509K+E516K double mutant in black lipid bilayers [19]. On the contrary, the  
446 intensification of the haemolytic activity observed in this mutant [19] is somehow  
447 perplexing, since it suggests that the ACT pore may be “reversible”, this is, no matter  
448 whether it is inserted with a given topology or if it is inserted with the reverse, in both  
449 cases the ions seem to be able to flow freely, as long as the entrance is not blocked by  
450 the AC domain.

451 In sum, to our best knowledge, the here presented model of membrane topology  
452 accounts for all available experimental data and suggests a plausible mechanism by  
453 which ACT can translocate the AC domain on target cells, at the cost of sacrificing the  
454 lytic potency.

455 Given the relevance of the specific cholesterol-recognition sites in ACT activity, it can be  
456 anticipated that targeting the here identified four CRAC/CARC motifs could be a new  
457 therapeutic option for inhibiting cholesterol-binding and hence reducing the toxicity of  
458 ACT on cells.

459

## 460 **EXPERIMENTAL PROCEDURES**

### 461 **Expression and purification of intact ACT**

462 ACT was expressed in *Escherichia coli* XL-1 blue cells (Stratagene) transformed with  
463 pT7CACT1 plasmid, kindly provided by Dr. Peter Sebo (Institute of Microbiology of the  
464 ASCR, v.v.i., Prague, Czech Republic) and purified as described by Karst et al. [8].

### 465 **Construction, expression and purification of the ACT mutants F415A, F485A, 466 F521A and F532A**

467 The variants of ACT F415A, F485A, F521A and F532A were cloned, expressed and  
468 purified from *E. coli*. *cyaA* DNA was amplified from genomic DNA by PCR and cloned in  
469 pET-15b (GenScript) using AsuII and NcoI enzymes to generate plasmid pME14. Site-

470 directed mutagenesis according to Agilent protocol was performed on pME14 to replace  
471 Ala codons for Phe in 415, 485, 521 and 532 residues. All plasmid inserts were  
472 sequenced to confirm accuracy of PCR and mutagenesis. For protein expression, *E coli*  
473 BL21 transformed with pME14 plasmid was grown in LB with 100 µg ml<sup>-1</sup> ampicillin to A<sub>600</sub>  
474 =0.6-0.8 and protein expression was induced by 4h growth in 1 mM isopropyl-β-D-  
475 thiogalactopyranoside. Protein purification was performed according to the method  
476 described in Karst et al (2014) [8]. Concentrations of purified ACT proteins were  
477 determined by the Bradford assay (Bio-Rad, USA) using bovine serum albumin as  
478 standard. All toxins purified by this method were more than 90% pure as judged by SDS-  
479 PAGE analysis (not shown).

#### 480 **Haemolysis assay**

481 Haemolysis assays were performed on 96-well plates. Briefly, serial dilutions of ACT  
482 (starting at 50 nM) in assay buffer (20 mM Tris pH 8.0, 150 mM NaCl, 2.0 mM CaCl)  
483 were prepared, onto which an equal volume of erythrocytes at a density of 5 x 10<sup>8</sup> cells/ml  
484 were added, and the mixtures incubated at 37°C for 180 min under constant stirring. At  
485 the end of the incubation time, the plates were centrifuged (2000 x g, 10 minutes, 4 °C)  
486 and the supernatant scattering was measured at 700 nm. Alternatively, time course  
487 experiments were performed recording continuously the scattering signal at 700 nm. The  
488 blank (0% hemolysis) corresponded to erythrocytes incubated in buffer without toxin and  
489 100%, and 100% hemolysis was obtained by adding Triton X-100 (0.1%) to the  
490 erythrocyte suspension.

#### 491 **Cell culture**

492  
493 J774A.1 macrophages (ATTC, number TIB-67) were grown at 37°C in DMEM (Sigma  
494 Aldrich, USA) containing 10% (v/v) heat inactivated FBS (Thermo Fisher Scientific,  
495 USA), 6 mM L-glutamine (Thermo Fisher Scientific, USA), 0.2 % (v/v) MycoZapTM  
496 Prophylactic (Lonza, Switzerland) and Penicillin-Streptomycin (Sigma Aldrich, USA) (100  
497 U/ml and 100 µg/ml respectively) in a 90% humidified atmosphere with 5% CO<sub>2</sub>.

#### 498 **Measurement of cAMP**

499  
500 cAMP produced in cells was measured upon incubation of different ACT concentrations  
501 (25-200 ng/ml) with J774A.1 cells (5 x 10<sup>5</sup> cells/ ml) for 30 min at 37°C. cAMP production  
502 was calculated by the direct cAMP ELISA kit (Enzo Lifesciences, USA).

#### 503 504 **Measurement of ACT or mutant toxins binding to lipid membranes determined by** 505 **flotation assays**

506  
507 Membrane association of ACT or ACT variants was assayed by flotation assay using  
508 large unilamellar vesicles (LUVs). LUVs were prepared following the extrusion method  
509 of Hope et al. [41]. Phospholipids and cholesterol were mixed in chloroform and dried  
510 under a N<sub>2</sub> stream. Traces of organic solvent were removed by 2h vacuum pumping.  
511 Subsequently, the dried lipid films were dispersed in buffer and subjected to 10 freeze-  
512 thaw cycles prior to extrusion 10 times through 2 stacked polycarbonate membranes with  
513 a nominal pore size of 100 nm (Nuclepore, Inc., USA). Phospholipid concentration of  
514 liposome suspensions was determined by phosphate analysis [43]. Liposome size was  
515 determined by Dynamic Light Scattering in Zetasizer Nano ZS (Malvern Panalytical Ltd,  
516 UK). Vesicle flotation experiments in sucrose gradients were subsequently performed  
517 following the method described by Yethon et al. [44]. In brief, 750 nM ACT and 1.5 mM  
518 LUVs (DOPC and DOPC.Chol 3:1 molar ratio, with 0.5% Rhodamine) are incubated for  
519 30 minutes at 37°C, under stirring. 125 µl of each sample was adjusted to a sucrose  
520 concentration of 1.4 M in a final volume of 300 µl and subsequently overlaid with 400µl  
521 and 300µl layers of 0.8 and 0.5 M sucrose, respectively. The gradient was centrifuged at

522 436,000 g for 180 min in a TLA 120.2 rotor (Beckman Coulter, USA). After centrifugation,  
523 four 250 µl fractions were collected as depicted in **Fig. 1A**. The material adhered to the  
524 tubes was collected into a fifth fraction by washing with 250 µl of hot (100 °C) 1% (w/v)  
525 SDS. The different fractions were run on SDS-PAGE, and the presence of ACT was  
526 probed by Coomassie. Liposomes were monitored by measuring rhodamine  
527 fluorescence. The values displayed on the right correspond to the percentages of protein  
528 found co-floating with vesicles, calculated by densitometry. Densitometry of the bands  
529 was performed by using ImageJ software, and the percentage of binding to vesicles was  
530 calculated from the band intensities measured in the vesicle-floating fractions, relative to  
531 the sum of the intensities measured in all fractions. The results displayed are  
532 representative of at least two replicates.  
533

534

535 **Author Contribution:** JA and HO planned the experiments; JA and RA performed  
536 experiments and analysed the data; HO wrote the paper with contributions from all the  
537 authors.

538 **Acknowledgements:** This study was supported by grants from the Spanish Ministerio  
539 de Economía y Competitividad BFU2017-82758-P (H.O.) and of Basque Government  
540 (Grupos Consolidados IT1264-19). JA was recipient of a fellowship from the University  
541 of Basque Country (UPV/EHU). RA holds a contract funded by the Fundación Biofísica  
542 Bizkaia.

543 **Conflicts of Interest:** The authors declare that they have no conflicts of interest with  
544 contents of this article. The funding sources had no involvement in the study design nor  
545 in the collection, analysis and interpretation of data nor in the writing of the report or in  
546 the decision to submit the article for publication.

547

548

## 549 REFERENCES

- 550 [1] Carbonetti NH (2007) Immunomodulation in the pathogenesis of *Bordetella pertussis*  
551 infection and disease. *Current Opinion in Pharmacology*. **7**, 272–278.
- 552 [2] Melvin JA, Scheller, EV, Miller, JF, Cotter, PA (2014) *Bordetella pertussis*  
553 pathogenesis: current and future challenges. *Nat Rev Microbiol.***12**, 274–288.
- 554 [3] Mattoo, S, Cherry, JD (2005) Molecular pathogenesis, epidemiology, and clinical  
555 manifestations of respiratory infections due to *Bordetella pertussis* and other *Bordetella*  
556 subspecies. *Clin. Microbiol. Rev.* **18**, 326–382.
- 557 [4] Welch, R A (2001) RTX toxin structure and function: a story of numerous anomalies  
558 and few analogies in toxin biology. *Curr. Top. Microbiol. Immunol.* **257**, 85– 111
- 559 [5] Vojtova, J, Kamanova, J, Sebo, P (2006) *Bordetella* adenylate cyclase toxin: a swift  
560 saboteur of host defense. *Curr. Opin. Microbiol.* **9**, 69-75.  
561
- 562 [6] Hackett, M, Guo, L, Shabanowitz, J, Hunt, DF, Hewlett, EL (1994) Internal lysine  
563 palmitoylation in adenylate cyclase toxin from *Bordetella pertussis*. *Science*, **266**, 433-  
564 435
- 565 [7] Glaser P, Sakamoto H, Bellalou J, Ullmann A, Danchin A (1988) Secretion of  
566 cyclolysin, the calmodulin-sensitive adenylate cyclase-haemolysin bifunctional protein of  
567 *Bordetella pertussis*. *EMBO J.* **7**, 3997-4004.  
568
- 569 [8] Karst JC, Ntsogo Enguéne VY, Cannella SE, Subrini O, Hessel A, Debard, S, Ladant  
570 D, Chenal A (2014) Calcium, acylation, and molecular confinement favor folding  
571 of *Bordetella pertussis* adenylate cyclase CyaA toxin into a monomeric and cytotoxic  
572 form. *J. Biol. Chem.* **289**, 30702–30716 10.1074/jbc.M114.580852
- 573 [9] Wolff J, Cook GH, Goldhammer AR, Berkowitz SA (1980) Calmodulin activates  
574 prokaryotic adenylate cyclase. *Proc Natl Acad Sci U S A.* **77**, 3841-3844.  
575
- 576 [10] Karst, J C, Barker, R, Devi, U, Swann, M J, Davi, M, Roser, S J, Ladant, D,  
577 and Chenal, A (2012) Identification of a region that assists membrane insertion and  
578 translocation of the catalytic domain of *Bordetella pertussis* CyaA toxin. *J. Biol.*  
579 *Chem.* **287**, 9200– 9212.
- 580 [11] Benz, R, Maier, E, Ladant, D, Ullmann, A, Sebo, P (1994) Adenylate cyclase toxin  
581 (CyaA) of *Bordetella pertussis*. Evidence for the formation of small ion-permeable  
582 channels and comparison with HlyA of *Escherichia coli*. *J. Biol. Chem.* **269**, 27231-  
583 27239.
- 584 [12] Thomas, S, Holland, IB, Schmitt, L (2014) The type 1 secretion pathway. The  
585 hemolysin system and beyond. *Biochim Biophys Acta* **1843**, 1629-1641.
- 586 [13] Guermonprez P, Khelef N, Blouin E, Rieu P, Ricciardi-Castagnoli P, Guiso N, Ladant  
587 D, Leclerc C (2001) The adenylate cyclase toxin of *Bordetella pertussis* binds to target  
588 cells via the alpha(M)beta(2) integrin (CD11b/CD18). *J Exp Med.* **193**, 1035-1044.  
589
- 590 [14] Hasan S, Kulkarni NN, Asbjarnarson A, Linhartova I, Osicka R, Sebo P,  
591 Gudmundsson GH (2018) *Bordetella pertussis* Adenylate Cyclase Toxin Disrupts  
592 Functional Integrity of Bronchial Epithelial Layers. *Infect Immun.* **86**, e00445-17.  
593
- 594 [15] Confer, DL, Eaton, JW (1982) Phagocyte impotence caused by an invasive bacterial  
595 adenylate cyclase. *Science*, **217**, 948-950.

- 596  
597 [16] Ehrmann, IE, Gray, MC, Gordon, VM, Gray, LS, Hewlett, EL (1991) Hemolytic  
598 activity of adenylate cyclase toxin from *Bordetella pertussis*. *FEBS Lett.* **278**, 79-83.
- 599 [17] González-Bullón D, Uribe KB, Largo E, Guembelzu G, García-Arribas AB, Martín  
600 C, Ostolaza H (2019) Membrane Permeabilization by *Bordetella* Adenylate Cyclase  
601 Toxin Involves Pores of Tunable Size. *Biomolecules*, **9**, 183. doi: 10.3390/biom9050183.
- 602 [18] Osickova, A, Osicka, R, Maier, E, Benz, R, Sebo, P (1999) An amphipathic alpha-  
603 helix including glutamates 509 and 516 is crucial for membrane translocation of  
604 adenylate cyclase toxin and modulates formation and cation selectivity of its membrane  
605 channels. *J. Biol. Chem.*, **274**, 37644-37650.
- 606 [19] Basler, M, Knapp, O, Masin, J, Fiser, R, Maier, E, Benz, R, Sebo, P, Osicka, R  
607 (2007) Segments crucial for membrane translocation and pore-forming activity of  
608 *Bordetella* adenylate cyclase toxin. *J. Biol. Chem.* **282**, 12419-12429.  
609
- 610 [20] Powthongchin, B, Angsuthanasombat, C (2009), Effects on haemolytic activity of  
611 single proline substitutions in the *Bordetella pertussis* CyaA pore-forming fragment. *Arch.*  
612 *Microbiol.* **191**, 1-9.  
613
- 614 [21]S. Juntapremjit, N, Thamwiriyasati, Kurehong, C, Prangkio, P, Shank, L,  
615 Powthongchin, B, Angsuthanasombat, C (2015), Functional importance of the Gly  
616 cluster in transmembrane helix 2 of the *Bordetella pertussis* CyaA-hemolysin:  
617 implications for toxin oligomerization and pore formation. *Toxicon*, **106**, 14-19.  
618
- 619 [22]Masin, J, Osickova, A, Sukova, A, Fiser, R, Halada, P, Bumba, L, Linhartova, I,  
620 Osicka, R, Sebo, P (2016) Negatively charged residues of the segment linking the  
621 enzyme and cytolysin moieties restrict the membrane-permeabilizing capacity of  
622 adenylate cyclase toxin. *Sci. Rep.*, **6**, 29137  
623
- 624 [23]P. Prangkio, S. Juntapremjit, M. Koehler, P. Hinterdorfer, C. Angsuthanasombt  
625 (2018) Contributions of the hydrophobic Helix 2 of the *Bordetella pertussis* CyaA-  
626 hemolysin to membrane permeabilization. *Protein Pept Lett*, **25**, 236-243  
627
- 628 [24]J. Roderova, A. Osickova, A. Sukova, G. Mikusova, R. Fiser, P. Sebo, R. Osicka, J.  
629 Masin (2019), Residues 529 to 549 participate in membrane penetration and pore-  
630 forming activity of the *Bordetella* adenylate cyclase toxin *Sci. Rep.*, **9**, 5758.  
631
- 632 [25] Sukova, A., Bumba, L., Srb, P., ...Sebo, P., Masin, J. (2020) Negative charge of the  
633 AC-to-Hly linking segment modulates calcium-dependent membrane activities of  
634 *Bordetella* adenylate cyclase toxin. *Biochimica et Biophysica Acta -*  
635 *Biomembranes* **1862**, 18310-18316.
- 636 [26] Eisenberg D, Schwarz E, Komaromy M, Wall R. (1984) Analysis of membrane and  
637 surface protein sequences with the hydrophobic moment plot. *J Mol Biol.* **179**, 125-42.
- 638 [27] L. Bumba, J. Masin, R. Fiser, P. Sebo (2010) *Bordetella* adenylate cyclase toxin  
639 mobilizes its beta2 integrin receptor into lipid rafts to accomplish translocation across  
640 target cell membrane in two steps. *PLoS Pathog.*, **9** Article e1000901
- 641 [28] Voegelé, A., Sadi, M., O'Brien, D.P., ...Ladant, D., Chenal, A. (2021) A High-Affinity  
642 Calmodulin-Binding Site in the CyaA Toxin Translocation Domain is Essential for  
643 Invasion of Eukaryotic Cells. *Advanced Science*, **8**, 2003630-  
644 doi.org/10.1002/advs.202003630.

- 645 [29] Iwaki, M., Konda, T. (2016) Adenylate cyclase toxin-mediated delivery of the S1  
646 subunit of pertussis toxin into mammalian cells. *Pathog Dis* **74**, 110. doi:  
647 10.1093/femspd/ftv110.
- 648 [30] González-Bullón D, Uribe, KB, Martín, C, Ostolaza, H (2017) Phospholipase A  
649 activity of Adenylate cyclase toxin mediates the translocation of its adenylate cyclase  
650 domain. *Proc Natl Acad Sci U S A*. **114**, E6784-E6793. doi: 10.1073/pnas.1701783114.
- 651 [31] González-Bullón D, Uribe, KB, Amuategi, J, Martín, C, Ostolaza, H (2021)  
652 Cholesterol stimulates the lytic activity of Adenylate Cyclase Toxin on lipid membranes  
653 by promoting toxin oligomerization and formation of pores with a greater effective size  
654 FEBS J
- 655 [32] Li H, Papadopoulos V (1998) Peripheral-type benzodiazepine receptor function in  
656 cholesterol transport. Identification of a putative cholesterol recognition/interaction amino  
657 acid sequence and consensus pattern. *Endocrinology*, **139**, 4991–4997.
- 658 [33] Fantini J and Barrantes (2013) How cholesterol interacts with membrane proteins:  
659 an exploration of cholesterol-binding sites including CRAC, CARC and tilted domains.  
660 *Front Physiol* **4**, 31-41.
- 661 [34] Jacques Fantini, Coralie Di Scala, Luke S. Evans, Philip T. F. Williamson,  
662 Francisco J. Barrantes (2016) A mirror code for protein-cholesterol interactions in the  
663 two leaflets of biological membranes . *Sci Rep*. **6**: 21907.
- 664 [35] Zidowetzki, R., Levitan, I (2007) Use of cyclodextrins to manipulate plasma  
665 membrane cholesterol content: evidence, misconceptions and control strategies.  
666 *Biochim Biophys Acta*, **1768**, 1311-1324.
- 667 [36] von Heijne, G (1986). The distribution of positively charged residues in bacterial  
668 inner membrane proteins correlates with the trans-membrane topology". *EMBO J* **5**,  
669 3021–3027.
- 670 [37] Baker, JA, Wong, W-C, Eisenhaber, B, Warwicker, J; Eisenhaber, F  
671 (2017). Charged residues next to transmembrane regions revisited: "Positive-inside rule"  
672 is complemented by the "negative inside depletion/outside enrichment rule". *BMC*  
673 *Biology*. **15**, 66
- 674 [38] Strandberg E., Killian J. A. (2003). Snorkeling of lysine side chains in  
675 transmembrane helices: how easy can it get? *FEBS Lett*. **544**, 69–73.
- 676 [39] Subrini, O, Sotomayor-Pérez, AC, Hessel, A, Spiaczka-Karst, J, Selwa, E, Sapay,  
677 N, Veneziano, R, Pansieri, J, Chopineau, J, Ladant, D, Chenal,  
678 A (2013) Characterization of a membrane-active peptide from the Bordetella pertussis  
679 CyaA toxin. *J. Biol. Chem*. **288**, 32585– 32598.
- 680 [40]A. Osickova, J. Masin, C. Fayolle, J. Krusek, M. Basler, E. Pospisilova, C. Leclerc,  
681 R. Osicka, P. Sebo (2010) Adenylate cyclase toxin translocates across target cell  
682 membrane without forming a pore. *Mol. Microbiol*, **75**, 1550-1562.
- 683 [41] Uribe KB, Etxebarria A, Martín C, Ostolaza H (2013) Calpain-Mediated Processing  
684 of Adenylate Cyclase Toxin Generates a Cytosolic Soluble Catalytically Active N-  
685 Terminal Domain. *PLoS One* **8**, e67648. doi: 10.1371/journal.pone.0067648.
- 686 [42] Hope MJ, Bally MB, Webb G, Cullis PR (1985) Production of large unilamellar  
687 vesicles by a rapid extrusion procedure. Characterization of size distribution, trapped

688 volume and ability to maintain a membrane potential. *Biochim Biophys Acta* **812**, 55–65.  
689 doi:10.1016/0005-2736(85)90521-8.

690 [43] Fiske, C.H., and Subbarow, Y (1925) The colorimetric determination of phosphorus.  
691 *J. Biol. Chem.* **66**, 375-400.

692 [44] Yethon, J. A., Epand, R. F., Leber, B., Epand, R. M., and Andrews, D. W. (2003)  
693 Interaction with a membrane surface triggers a reversible conformational change in Bax  
694 normally associated with induction of apoptosis. *J. Biol. Chem.* **278**, 48935–48941.

695

696



## 697 **FIGURE LEGENDS**

698

699 **Figure 1. Schematic drawing of the ACT polypeptide chain in which the investigated four**  
700 **potential cholesterol-recognition motifs are detailed.** Two predicted  $\alpha$ -helices in the TR,  
701 namely, h1 and h2, and three of the five predicted amphipathic and hydrophobic helices of the  
702 pore-forming domain, namely HI, HII and HIII have been depicted with more detail. Blue or red  
703 spots have been used to specify the location of each one of the four potential cholesterol-  
704 recognition motifs in each of the helical segments.

705 **Figure 2. Effect of ACT preincubation with free cholesterol and of membrane sterol**  
706 **depletion on ACT-induced haemolytic activity.** (A) ACT (100 nM) was preincubated for 30  
707 minutes at RT in the presence of free cholesterol (0-25  $\mu$ M). Then sheep erythrocytes at a density  
708 of  $5 \times 10^8$  cells/ml were added and the mixture was further incubated for 180 min at 37°C.  
709 Haemolytic activity was measured as decrease of turbidity at 700 nm and expressed as  
710 haemolytic percentages (calculated as detailed in the Experimental Procedures section). Data  
711 represented in the figure correspond to the mean of three independent experiments  $\pm$ SE. (B)  
712 Sheep erythrocytes ( $5 \times 10^8$  cells/ml) were pre-treated with methyl- $\beta$ -cyclodextrin (5 mM) for 30  
713 min at 37°C to decrease the cholesterol content available in the cell membrane. Then ACT was  
714 added at different concentrations and further incubations of 180 min were performed before  
715 determining the lysis percentage.

716 **Figure 3. Effect of point Ala substitutions in the central Phe residues of the potential**  
717 **cholesterol-binding sites CRAC<sup>415</sup>, CARC<sup>485</sup>, CRAC<sup>521</sup> and CARC<sup>532</sup> on the kinetics of the**  
718 **ACT-induced haemolysis.** Raw traces of the kinetics recorded from a representative experiment  
719 of the haemolysis induced by intact ACT (50 nM) or by each one of the four mutant toxins (50  
720 nM). A suspension of sheep erythrocytes ( $5 \times 10^8$  cells/ml) was incubated with each protein for  
721 180 min at 37°C, recording the scattering changes measured at 700 nm at every second. Then  
722 the haemolysis percentage was calculated as detailed in the Experimental Procedures section  
723 and depicted in the figure. The traces shown correspond to a representative experiment from  
724 three experiments performed independently.

725 **Figure. 4. Effect of point Ala substitutions in the central Phe residues of the potential**  
726 **cholesterol-binding sites CRAC<sup>415</sup>, CARC<sup>485</sup>, CRAC<sup>521</sup> and CARC<sup>532</sup> on the (A) maximum**  
727 **haemolytic percentage, and (B)  $t_{1/2}$  of the ACT-induced haemolysis.** Haemolysis induced by  
728 50 nM of intact ACT or by each one of the four mutant toxins was assayed with a suspension of  
729 sheep erythrocytes ( $5 \times 10^8$  cells/ml) incubated with each protein for 180 min at 37°C. Data  
730 represented in the figure correspond to the mean of three independent experiments  $\pm$  SE.

731 **Figure 5. Quantification of the binding of ACT or ACT mutants to lipid bilayers.** Membrane  
732 partitioning as measured by flotation assays using large unilamellar vesicles composed of  
733 DOPC:Chol (3:1 molar ratio). Details on the flotation assay methodology are provided in the  
734 section of Experimental Procedures.

735 **Figure 6. Point Ala substitutions in the central Phe residue of the potential cholesterol-**  
736 **binding sites CRAC<sup>415</sup>, CARC<sup>485</sup>, CRAC<sup>521</sup> and CARC<sup>532</sup> prominently decrease AC domain**  
737 **translocation.** Translocation of AC domain was assessed by determining the intracellular  
738 concentration of cAMP (pmol/mg protein) generated in J774A.1 cells ( $1 \times 10^5$  cells/ml) suspended  
739 in 20 mM Tris-HCl, pH=8.0 buffer supplemented with 150 mM NaCl and 2 mM CaCl<sub>2</sub>, upon  
740 treatment for 30 minutes at 37°C with different concentrations (25-200 ng/ml) of intact ACT or the  
741 corresponding mutant toxin.

742 **Figure 7. Schematic model of the proposed membrane topology for the helical elements**  
743 **constituting the TR and the HD of ACT.** The figure shows a scheme of the complete membrane  
744 topology for the h1, h2, HI, HII and HIII helices, as predicted here, on the basis of the experimental  
745 data shown in our study. From the proposed topology it can be concluded that both for AC  
746 transport and for lytic activity, ACT would adopt a single transmembrane topology as drawn here,  
747 that is stabilized by the binding to membrane cholesterol through the here identified four  
748 CRAC/CARC motifs. We hypothesize that the cholesterol-mediated transmembrane insertion of

749 the h1-h2-HI-HIII helices would bring the extracellularly located AC domain near the pore structure.  
750 Spatial proximity of the AC domain from the pore would plausibly allow interactions to be  
751 established between segments of the AC domain and one or several residues of said helices  
752 forming the pore. Such native interactions would be necessary to assure penetration of the AC  
753 polypeptide into the pore lumen and its transport to the target cytosol. The h1 and h2 helices  
754 localize to the so-called TR of ACT extending from residues  $\approx$ 400-500. HI to HV helices form part  
755 of the HD which extends from residues  $\approx$ 500-700. The four CARC and CRAC motifs identified,  
756 described in the text, have been drawn in the model as magenta and blue colour ellipses,  
757 respectively. Red dashed lines between the AC domain and helices of the HD represent possible  
758 native interactions that would expectedly be established and that would be necessary to spatially  
759 approach the AC domain to the entrance of the pore formed by the hydrophobic helices. More  
760 details are given in the text of the **Discussion** section.

761 **Figure 8. Schematic model of the membrane topology proposed for the helical elements**  
762 **constituting the TR and the HD of ACT for ACT variants in which the Phe in 415 or 485**  
763 **residues are mutated by Ala.** We find here that the F415A and F485A mutations inhibit  
764 translocation and enhance the lytic activity. Hampering cholesterol binding through the CARC<sup>415</sup>  
765 and CRAC<sup>485</sup> motifs would provoke a change in the topology of the h1-h2 helices, to be placed  
766 extracellularly and would gain in mobility. This would hinder establishment of the native  
767 interactions between the AC segments and the pore segments, moving away the AC domain from  
768 the pore entrance, This distancing of the AC domain would eliminate the steric hindrance at the  
769 pore entrance allowing a free ion flux, which would be detected as an increased lytic activity, at  
770 the same time that the AC delivery would result diminished. More details are given in the text of  
771 the **Discussion** section. The four CARC and CRAC motifs identified, described in the text, have  
772 been drawn in the model as magenta and blue colour ellipses, respectively.

773 **Figure 9. Schematic model of the membrane topology of the helical elements constituting**  
774 **the TR and the HD for the double mutant E509K+E516K.** Our model predicts that the net  
775 charge change in the double mutant (-2 to +2) would inhibit the transmembrane topology of HI,  
776 forcing this helix to place out of the membrane. This HI location could change the side of the  
777 membrane in which cholesterol would now be recognized by the CRAC<sup>521</sup> motif, passing from  
778 being bound in the cytosolic side of the membrane, to bind it in the extracellular side.  
779 Concomitantly, HI exit would force HII to insert into the bilayer with reverse orientation, and to  
780 achieve stabilizing through cholesterol binding via the CARC<sup>532</sup> motif, but now at the extracellular  
781 side of the membrane. This topology change of HII would in turn provoke subsequent change in  
782 the membrane topology of HIII, and so on for the rest of the helices that conform the pore  
783 structure. This would expectedly eliminate the aforementioned native interactions established with  
784 segments of the AC domain, moving the AC domain away from the pore entrance and, affecting  
785 consequently the AC translocation. Interestingly, ion selectivity of the pore could also result  
786 altered by the inverted location of the residues at the ends of the helices.

787

788

789 **Table I**

| PATTERN                   |                           | AMINOACIDS       | SEQUENCE                |
|---------------------------|---------------------------|------------------|-------------------------|
| [LV]-X(1,5)-Y-X(1,5)-[RK] | AC DOMAIN                 | 161-166          | VQYRRK                  |
|                           |                           | 215-224          | VTDYLRTRR               |
|                           |                           | 330-338          | LKEYIGQQR               |
|                           |                           | 343-348          | VFYENR                  |
|                           | HYDROPHOBIC DOMAIN        | 626-638          | LVQQSHYADQLDK           |
|                           |                           | 653-661          | LLAQLYRDK               |
|                           | HEMOLYSIN DOMAIN          | 721-728          | LANDYARK                |
|                           |                           | 732-741          | LGGPQAYFEK              |
|                           |                           | 938-945          | VSYAALGR                |
|                           |                           | 1246-1255        | LGVDYYDNVR              |
| [RK]-X(1,5)-Y-X(1,5)-[LV] | AC DOMAIN                 | 117-128          | KERLDYLRQAGL            |
|                           |                           | 348-352          | RAYGV                   |
|                           |                           | 399-410          | RQDSGYDSLGDV            |
|                           | HEMOLYSIN DOMAIN          | 984-995          | RTENVQYRHVEL            |
| [LV]-X(1,5)-F-X(1,5)-[RK] | AC DOMAIN                 | 82-88            | LSKLFGR                 |
|                           |                           | 198-206          | LSNFRDSAR               |
|                           |                           | 271-280          | VITDFELEVR              |
|                           | LINKER                    | 481-487          | LMTQ <sup>F</sup> GR    |
|                           | HYDROPHOBIC DOMAIN        | 518-527          | VSG <sup>F</sup> FRGSSR |
|                           |                           | HEMOLYSIN DOMAIN | 804-812                 |
|                           | 1122-1131                 |                  | LNLFSVDHVK              |
|                           | 1484-1491                 |                  | VDFSGPGR                |
|                           | 1620-1624                 |                  | LW <sup>F</sup> AR      |
|                           | [RK]-X(1,5)-F-X(1,5)-[LV] | AC DOMAIN        | 34-43                   |
| 84-92                     |                           |                  | KLFGRAPEV               |
| 165-176                   |                           |                  | RKGGDDFEAVKV            |
| 312-316                   |                           |                  | KIFVV                   |
| 355-362                   |                           |                  | KSLFDDGL                |
| 372-380                   |                           |                  | RSKFSPDVL               |
| LINKER                    |                           | 413-420          | RS <sup>F</sup> SLGEV   |
| HYDROPHOBIC DOMAIN        |                           | 527-534          | RWAGG <sup>F</sup> GV   |
|                           |                           | HEMOLYSIN DOMAIN | 798-808                 |
| 836-845                   |                           |                  | RPALTFITPL              |
| 857-862                   |                           |                  | KTGKSEFTTFV             |
| 860-870                   |                           |                  | KSEFTTFVEIV             |
| 1498-1504                 |                           |                  | KGVFLSL                 |
| 1506-1511                 | KGFASL                    |                  |                         |

790

791

792  
793  
794  
795  
796

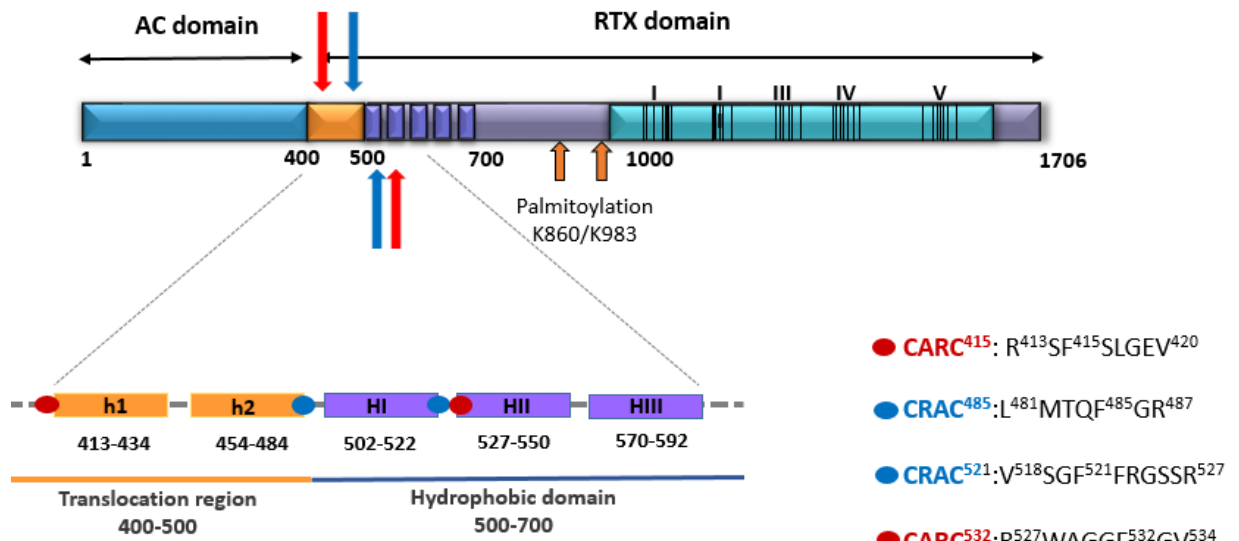

797  
798  
799  
800  
801  
802  
803  
804  
805  
806  
807

**Figure 1**



809 **A**

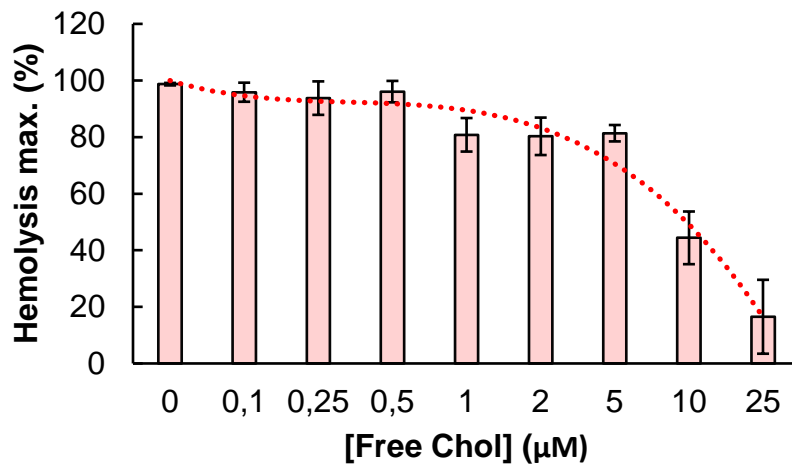

810

811 **B**

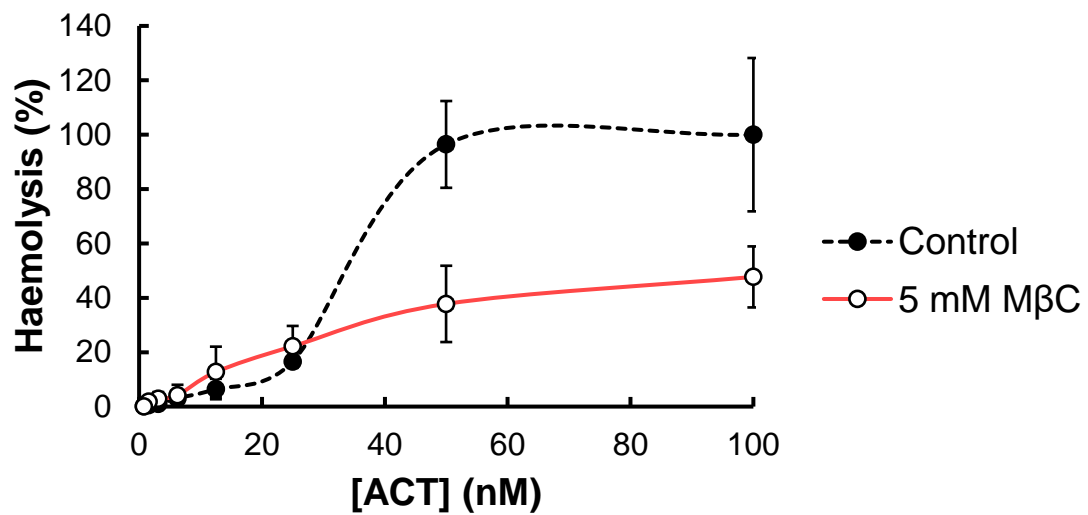

812

813

814

815

816 **Figure 2**

817

818  
819  
820  
821  
822  
823

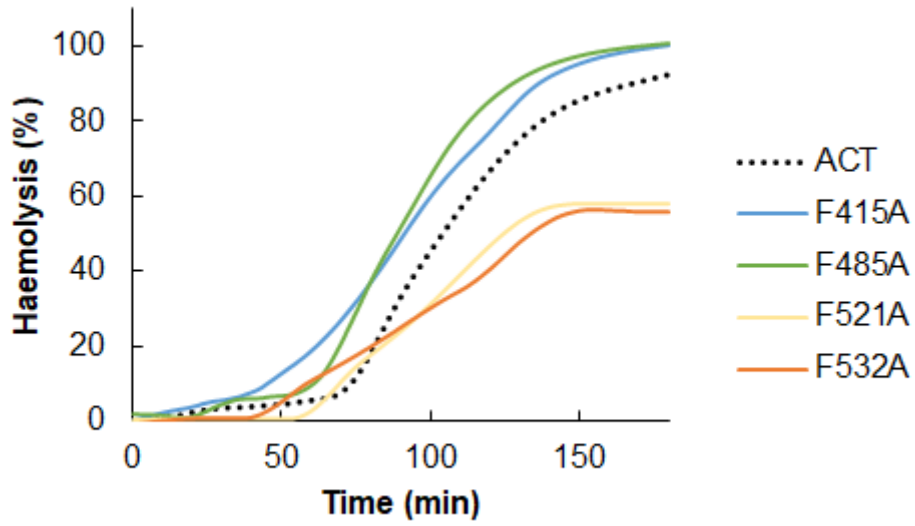

824  
825  
826  
827  
828  
829  
830  
831  
832  
833  
834

**Figure 3**

835

836

837

838

**A**

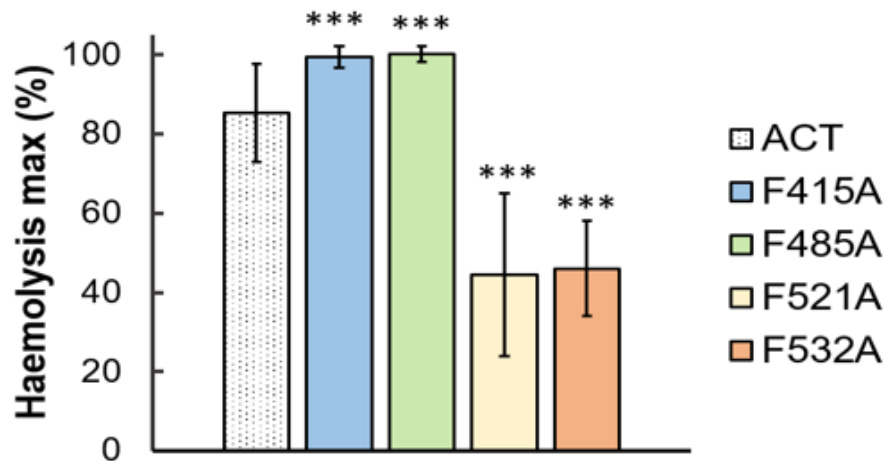

**B**

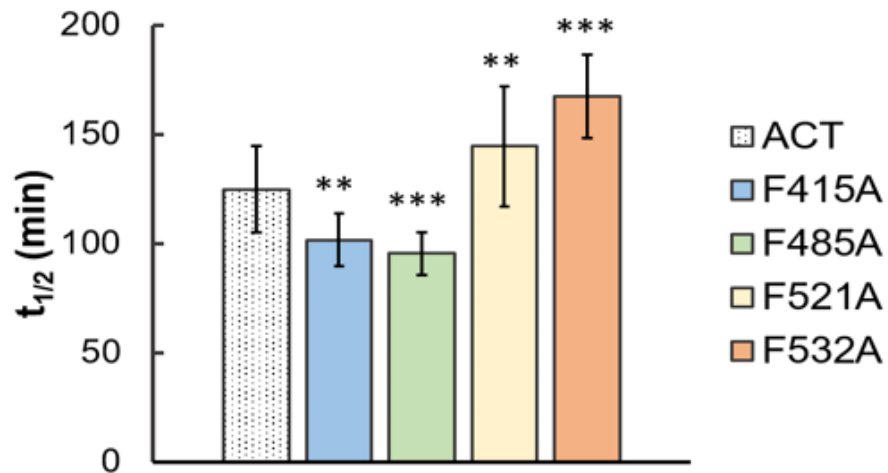

839

840

841

842

843

844 **Figure 4**



845  
846  
847  
848  
849  
850  
851  
852

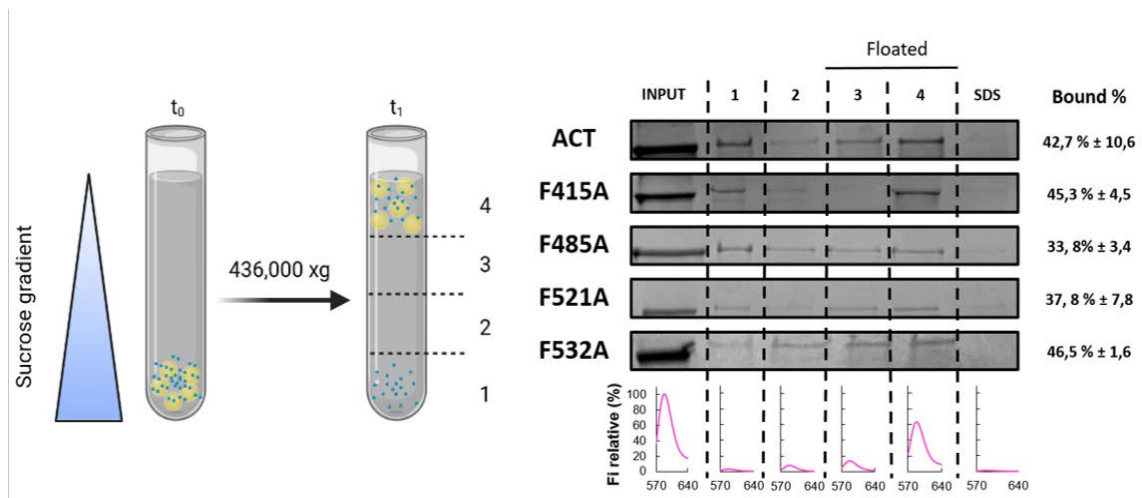

853  
854  
855  
856  
857  
858  
859  
860  
861  
862  
863  
864  
865  
866  
867  
868

**Figure 5**

869  
870  
871  
872  
873  
874

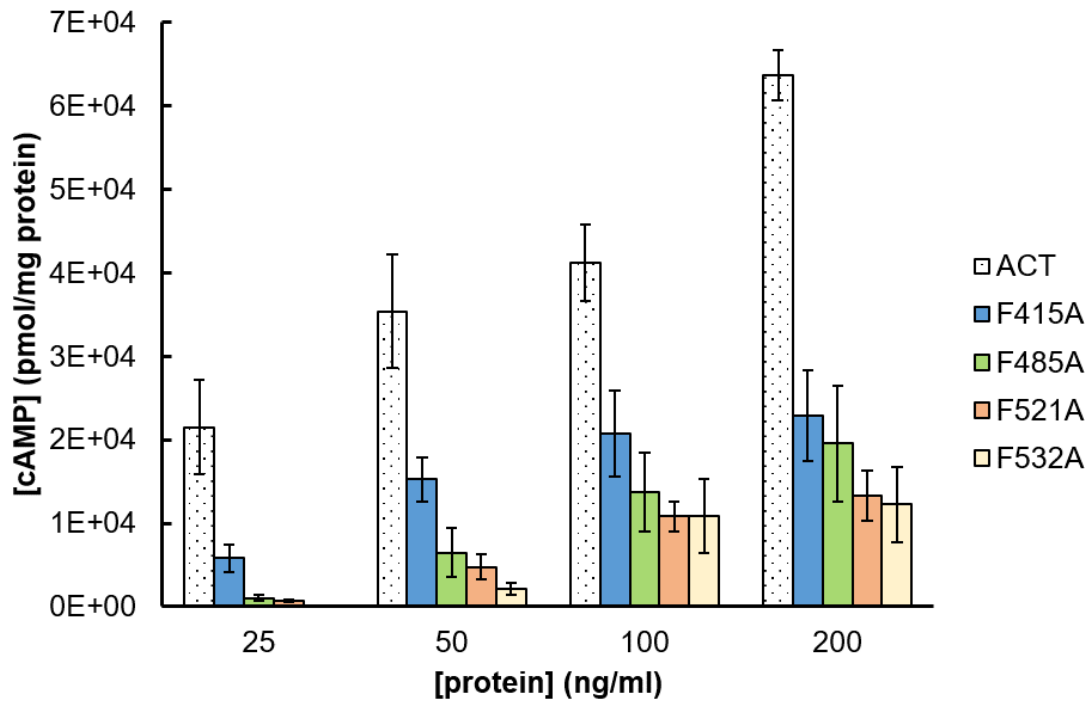

875  
876  
877  
878  
879  
880  
881  
882  
883  
884

**Figure 6**

885

886

887

888

889

890

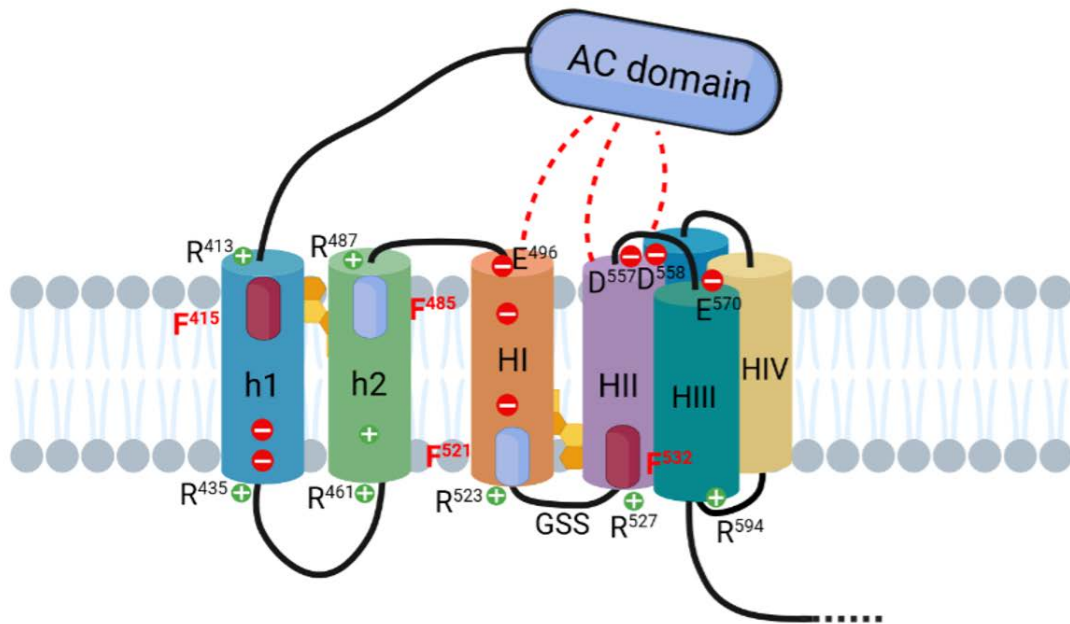

891

892

893

894

895

896

897

898

899

900 **Figure 7**

901

902

903

904

905

906  
907  
908  
909  
910  
911  
912  
913  
914

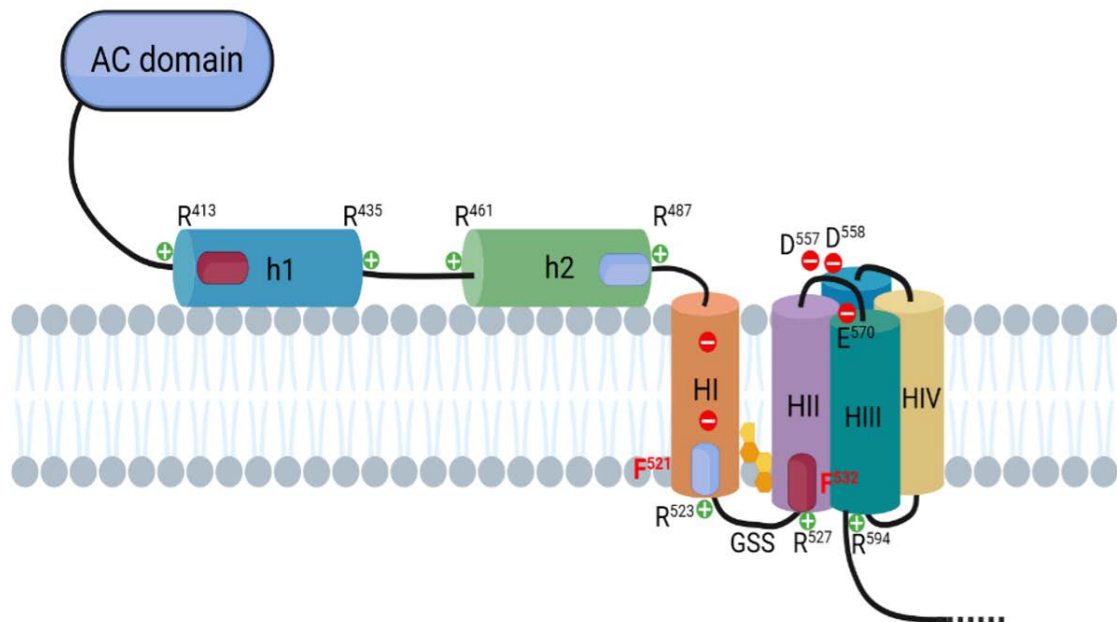

915  
916  
917  
918  
919  
920  
921  
922  
923  
924  
925  
926

**Figure 8**

927  
928  
929  
930  
931  
932  
933  
934  
935

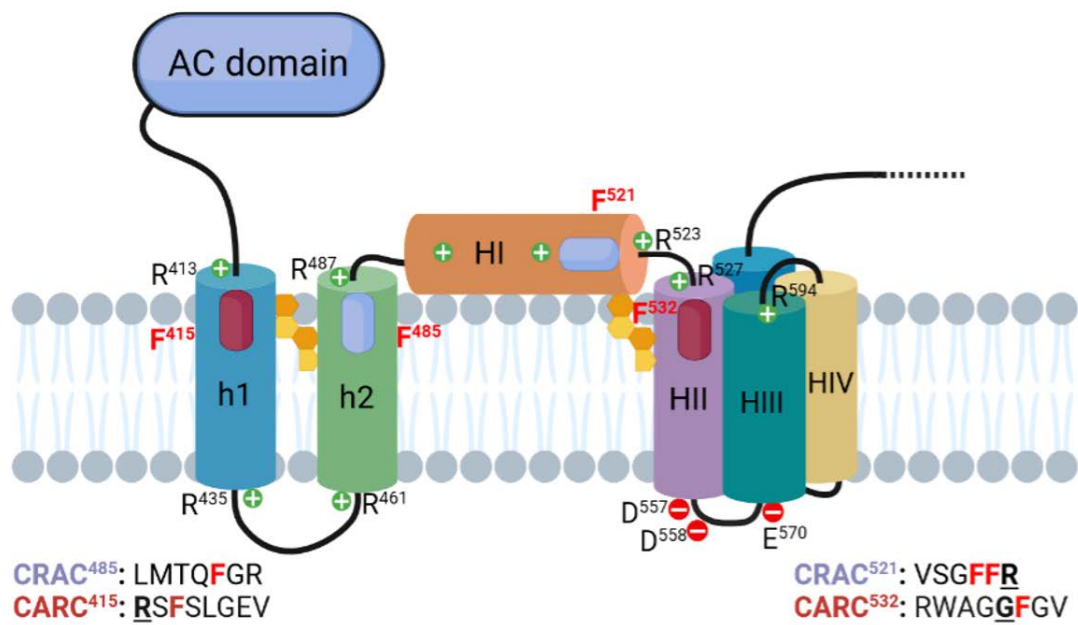

936  
937  
938  
939  
940  
941  
942  
943

Figure 9
